# Supplementary material for: Pulsed Nd:YAG laser induced high throughput stereospecific [2 + 2] cycloaddition of highly organized 1,2-bis(4-pyridyl)ethylene in a supramolecular scaffold
Source: Royal Society of Chemistry journal article supplement (doi:10.1039/c3ra40558c), 2013-01-01
Supplement: c3ra40558c.pdf [file c3ra40558c.pdf]

Electronic Supplementary Information

**Pulsed Nd:YAG laser induced high throughput stereospecific [2+2]  
cycloaddition of highly organized 1,2-bis(4-pyridyl)ethylene in a  
supramolecular scaffold**

Izumi Iwakura, Saki Kato, Ryotaro Hino, Ayumu Fukumoto, Keiko Komori-Orisaku and  
Yoshihiro Koide\*

Figures, Tables, and Schemes

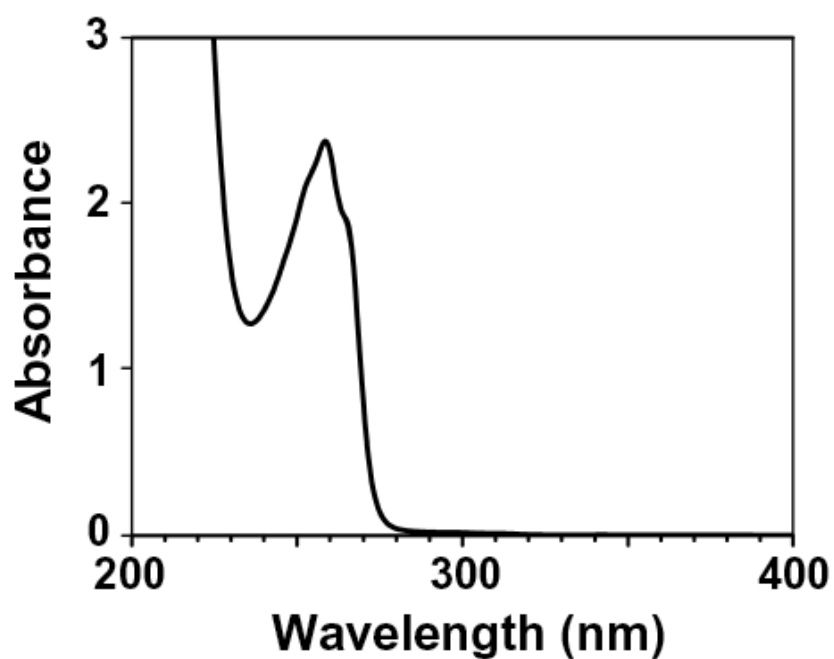

**Figure S1.** The absorption spectrum of *rctt*-tpcb (3.6 mM) in CH<sub>3</sub>CN recorded using a quartz cuvette with 1 mm optical path length.

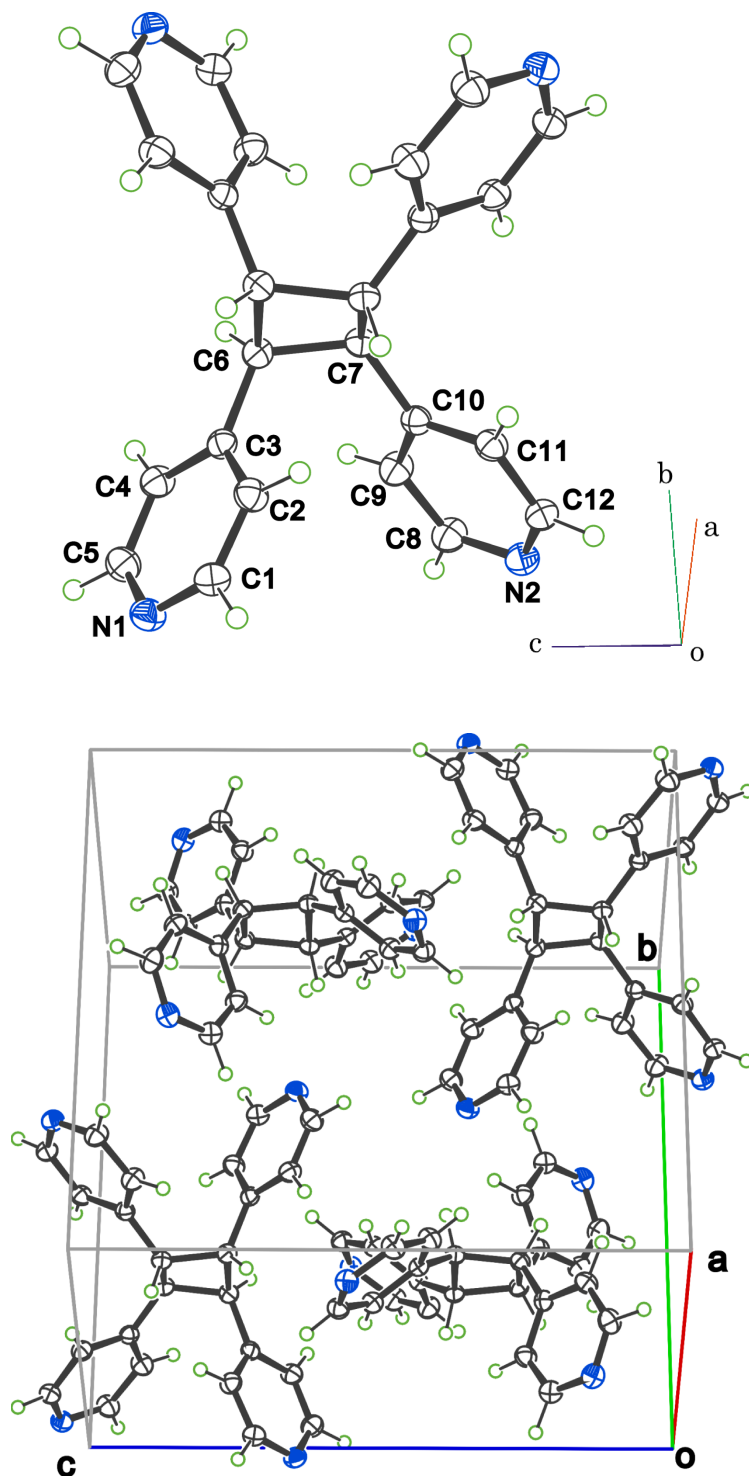

**Figure S2.** ORTEP diagrams of *rctt-tpcb* showing the atom-numbering scheme (a), and a unit cell packing (b), with thermal ellipsoids drawn at the 50 % probability level. H atoms were placed at calculated positions and refined as a riding model.

**Table S1.** Selected bond lengths (Å) of *rctt*-tpcb.

|     |   |                 |            |
|-----|---|-----------------|------------|
| N1  | - | C1              | 1.340(2)   |
| C7  | - | C10             | 1.499(2)   |
| C9  | - | C10             | 1.390(2)   |
| C10 | - | C11             | 1.392(2)   |
| N2  | - | C12             | 1.339(2)   |
| C11 | - | C12             | 1.392(2)   |
| C1  | - | C2              | 1.386(2)   |
| C2  | - | C3              | 1.396(2)   |
| C3  | - | C4              | 1.395(2)   |
| N1  | - | C5              | 1.339(2)   |
| C4  | - | C5              | 1.390(2)   |
| C3  | - | C6              | 1.5082(19) |
| C6  | - | C6 <sup>i</sup> | 1.569(3)   |
| C6  | - | C7              | 1.574(2)   |
| C7  | - | C7 <sup>i</sup> | 1.542(3)   |
| N2  | - | C8              | 1.346(2)   |
| C8  | - | C9              | 1.386(2)   |

i) 1.5-x, 1.5-y, z

**Table S2.** Selected bond angles (°) of *rctt*-tpcb.

|     |   |                 |   |                 |            |
|-----|---|-----------------|---|-----------------|------------|
| C5  | - | N1              | - | C1              | 115.68(14) |
| C8  | - | C9              | - | C10             | 119.87(15) |
| C12 | - | C11             | - | C10             | 119.19(14) |
| C9  | - | C10             | - | C11             | 116.93(13) |
| N2  | - | C12             | - | C11             | 124.31(14) |
| N1  | - | C1              | - | C2              | 124.32(15) |
| C4  | - | C3              | - | C2              | 116.31(13) |
| C1  | - | C2              | - | C3              | 119.73(15) |
| C5  | - | C4              | - | C3              | 119.69(14) |
| N1  | - | C5              | - | C4              | 124.24(16) |
| C4  | - | C3              | - | C6              | 121.08(13) |
| C2  | - | C3              | - | C6              | 122.60(13) |
| C3  | - | C6              | - | C6 <sup>i</sup> | 114.14(14) |
| C10 | - | C7              | - | C6              | 120.04(12) |
| C7  | - | C7 <sup>i</sup> | - | C6              | 89.67(7)   |
| C3  | - | C6              | - | C7              | 117.48(12) |
| C6  | - | C6 <sup>i</sup> | - | C7              | 88.69(7)   |
| C10 | - | C7              | - | C7 <sup>i</sup> | 121.49(13) |
| C9  | - | C10             | - | C7              | 119.79(13) |
| C11 | - | C10             | - | C7              | 123.23(13) |
| C12 | - | N2              | - | C8              | 115.90(13) |
| N2  | - | C8              | - | C9              | 123.76(15) |

i) 1.5-x, 1.5-y, z

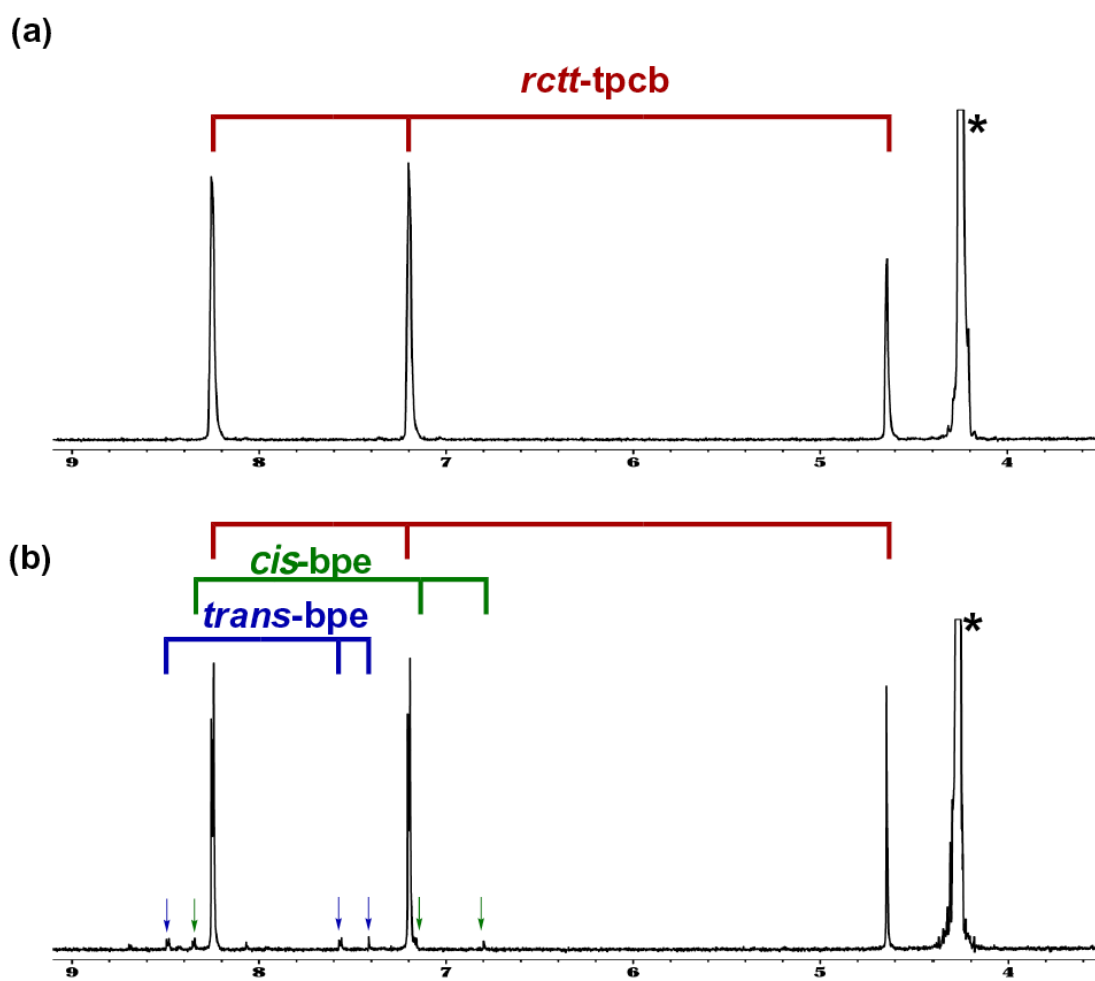

**Figure S3.**  $^1\text{H}$  NMR spectrum of an authentic sample of *rctt-tpcb* before (top) and after (bottom) irradiated at 266 nm in  $\text{CD}_3\text{CN}/\text{D}_2\text{O}$  (50 v/v%). Solvent peaks are denoted by the asterisk.

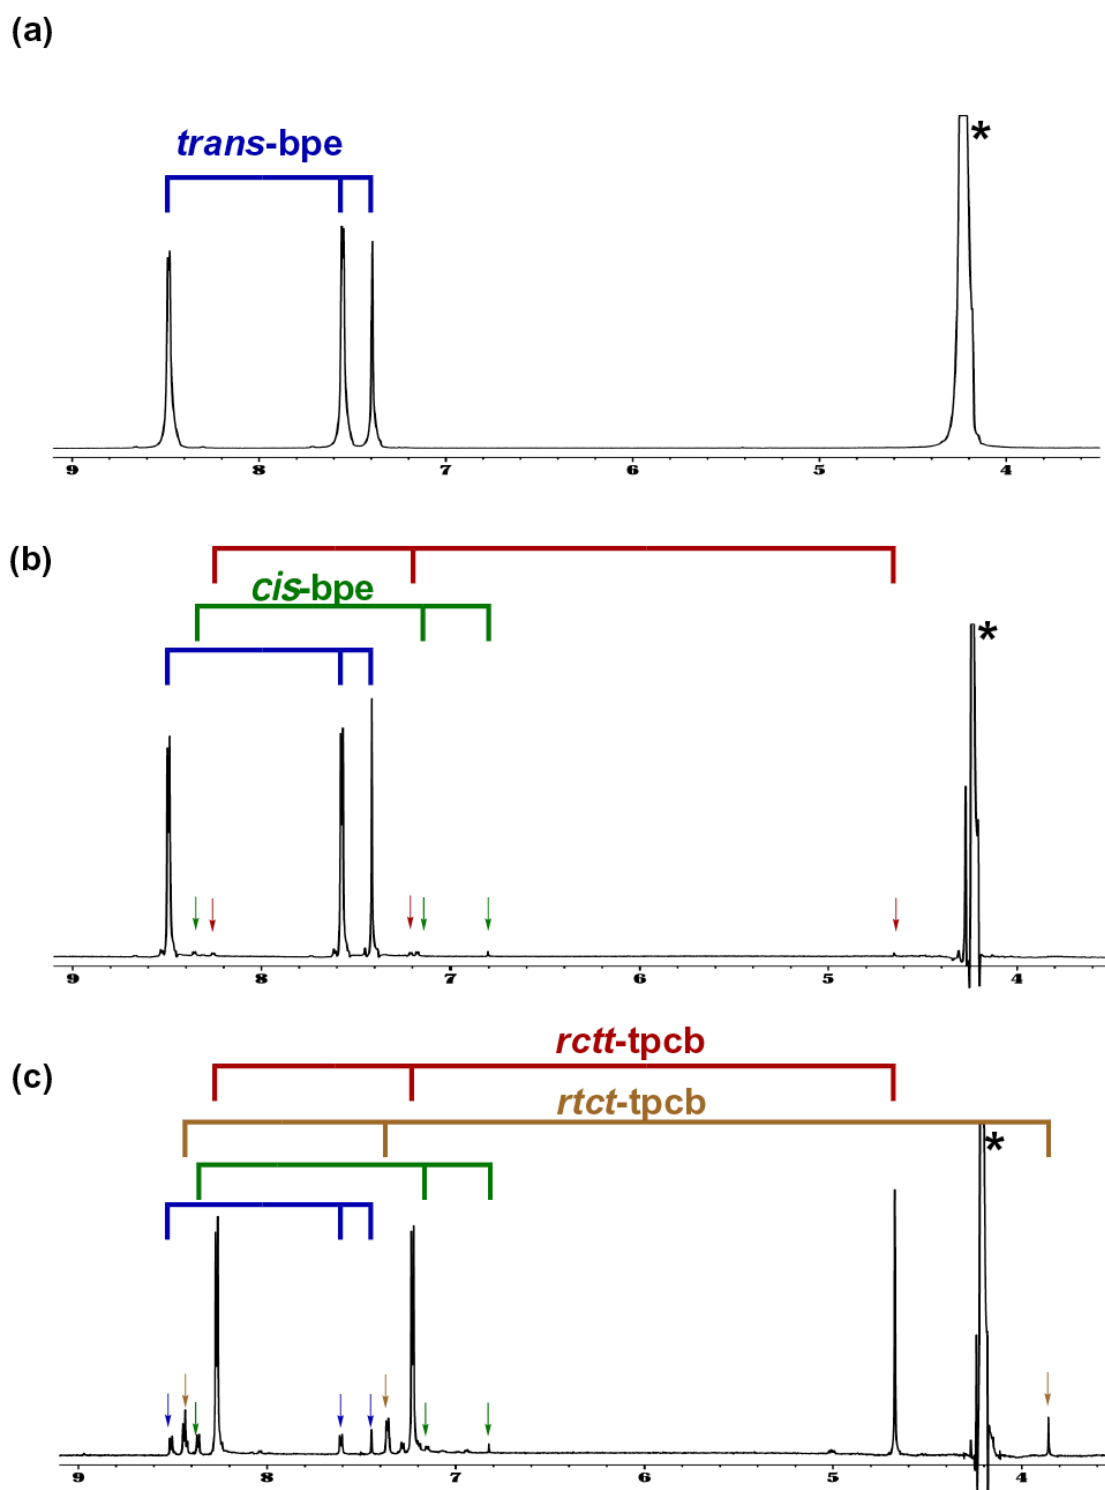

**Figure S4.**  $^1\text{H}$  NMR spectrum of the reaction solution ( $\text{CD}_3\text{CN}/\text{D}_2\text{O}$  (50 v/v%)) before (a) and after (b) irradiated by 266 nm Nd:YAG laser pulse, and after irradiated by 355 nm laser pulse (c). Solvent peaks are denoted by the asterisk.

**Table S3.** Comparison of the product ratio excited by 3rd and 4th harmonic generation Nd:YAG laser pulse.

| Ext. wavelength | <i>trans</i> -bpe (%) | <i>cis</i> -bpe (%) | <i>rctt</i> -tpcb (%) | <i>rtct</i> -tpcb (%) |
|-----------------|-----------------------|---------------------|-----------------------|-----------------------|
| 355 nm          | 6                     | 4                   | 77                    | 13                    |
| 266 nm          | 98                    | 1                   | 1                     | 0                     |

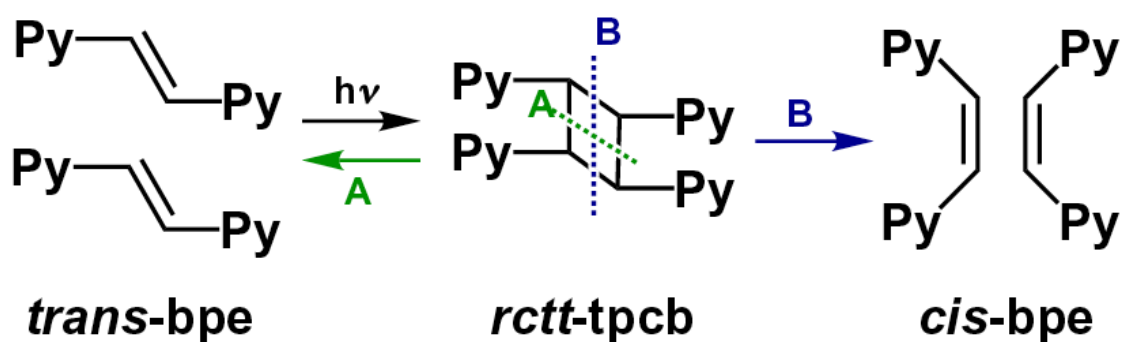

**Scheme S1.** Schematic representation of relationship between two patterns of symmetric *rctt*-tpcb ring cleavage and the resulting geometries of bpe isomers: Cleavage along the dotted line **A** and **B** yield two *trans*-bpe and two *cis*-bpe, respectively. Py = pyridyl ring.
